# Supplementary material for: Nanosuspension-Based Dissolvable Microneedle Arrays to Enhance Diclofenac Skin Delivery
Source: MDPI journal article supplement (doi:10.3390/pharmaceutics15092308), 2023-09-13
Supplement: s1 [file s1]

*Supplementary Material*

# Nanosuspension-based dissolvable microneedle arrays to enhance diclofenac skin delivery

Luca Casula <sup>1,†</sup>, Rosa Pireddu <sup>1,†</sup>, Maria Cristina Cardia <sup>1</sup>, Elena Pini <sup>2</sup>, Donatella Valenti <sup>1</sup>, Michele Schlich <sup>1</sup>, Chiara Sinico <sup>1</sup>, Salvatore Marceddu <sup>3</sup>, Nina Dragičević <sup>4</sup>, Anna Maria Fadda <sup>1</sup> and Francesco Lai <sup>1\*</sup>

<sup>1</sup> Dipartimento di Scienze della Vita e dell' Ambiente, Sezione di Scienze del Farmaco, CNBS, Università degli Studi di Cagliari, 09124 Cagliari, Italy; luca.casula@unica.it (L.C.); rosapireddu@unica.it (R.P.); cardiamr@unica.it (M.C.C.); valenti@unica.it (D.V.); michele.schlich@unica.it (M.S.); sinico@unica.it (C.S.); mfadda@unica.it (A.M.F)

<sup>2</sup> Department of Pharmaceutical Sciences, General and Organic Chemistry Section "Alessandro Marchesini", University of Milan, 20133 Milan, Italy; elena.pini@unimi.it

<sup>3</sup> Istituto di Scienze delle Produzioni Alimentari (ISPA)-CNR, Sez. di Sassari, 07040 Balduina, Italy; salvatore.marceddu@cnr.it

<sup>4</sup> Department of Pharmacy, Singidunum University, Belgrade, Serbia; ndragicevic@singidunum.ac.rs

\* Correspondence: frlai@unica.it; Tel.: +39-070-675-8514

† These authors contributed equally to this work.

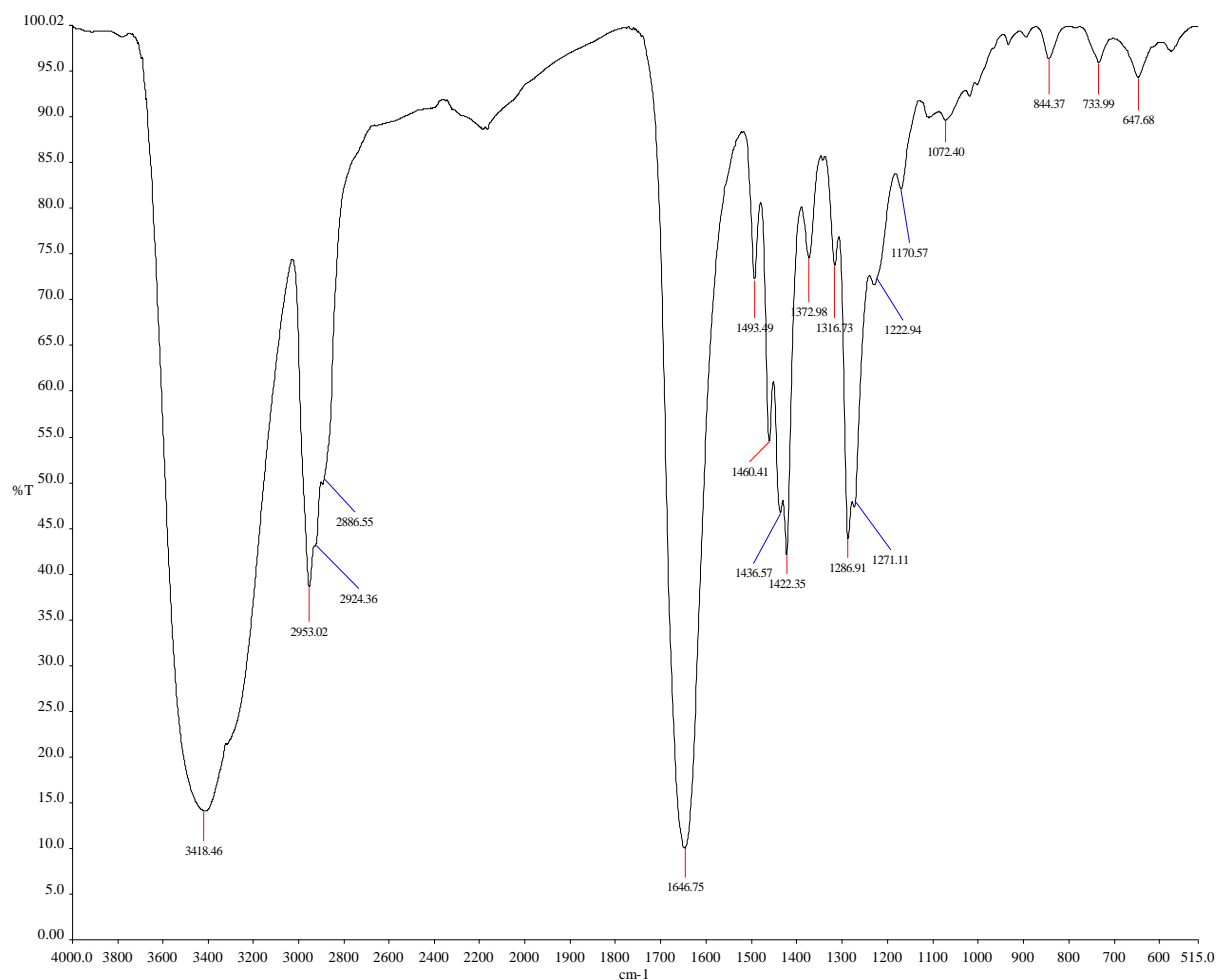

**Figure S1.** ATR-FTIR spectra of PVP.

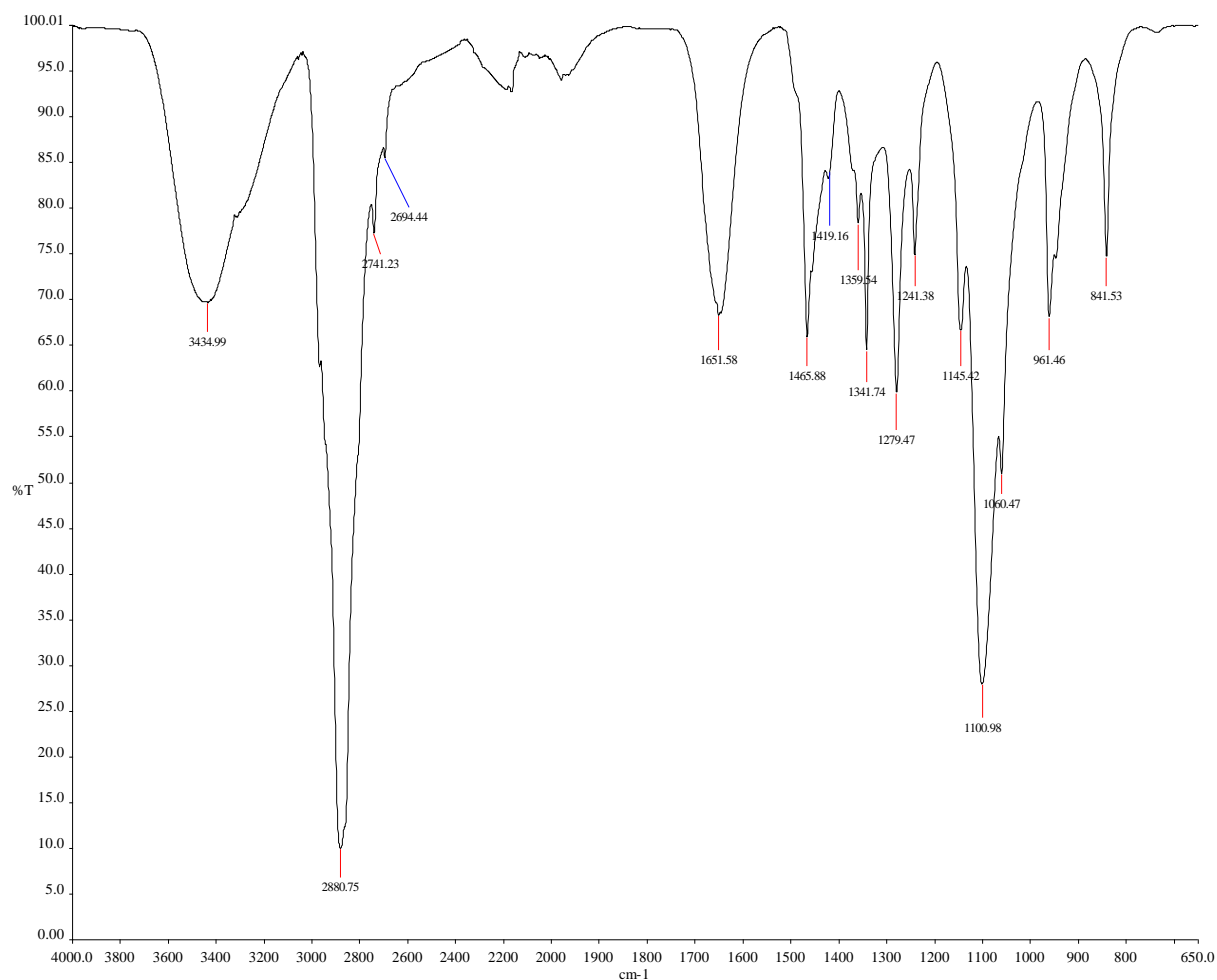

**Figure S2.** ATR-FTIR spectra of PM PVP/P118 (1:1 w/w).

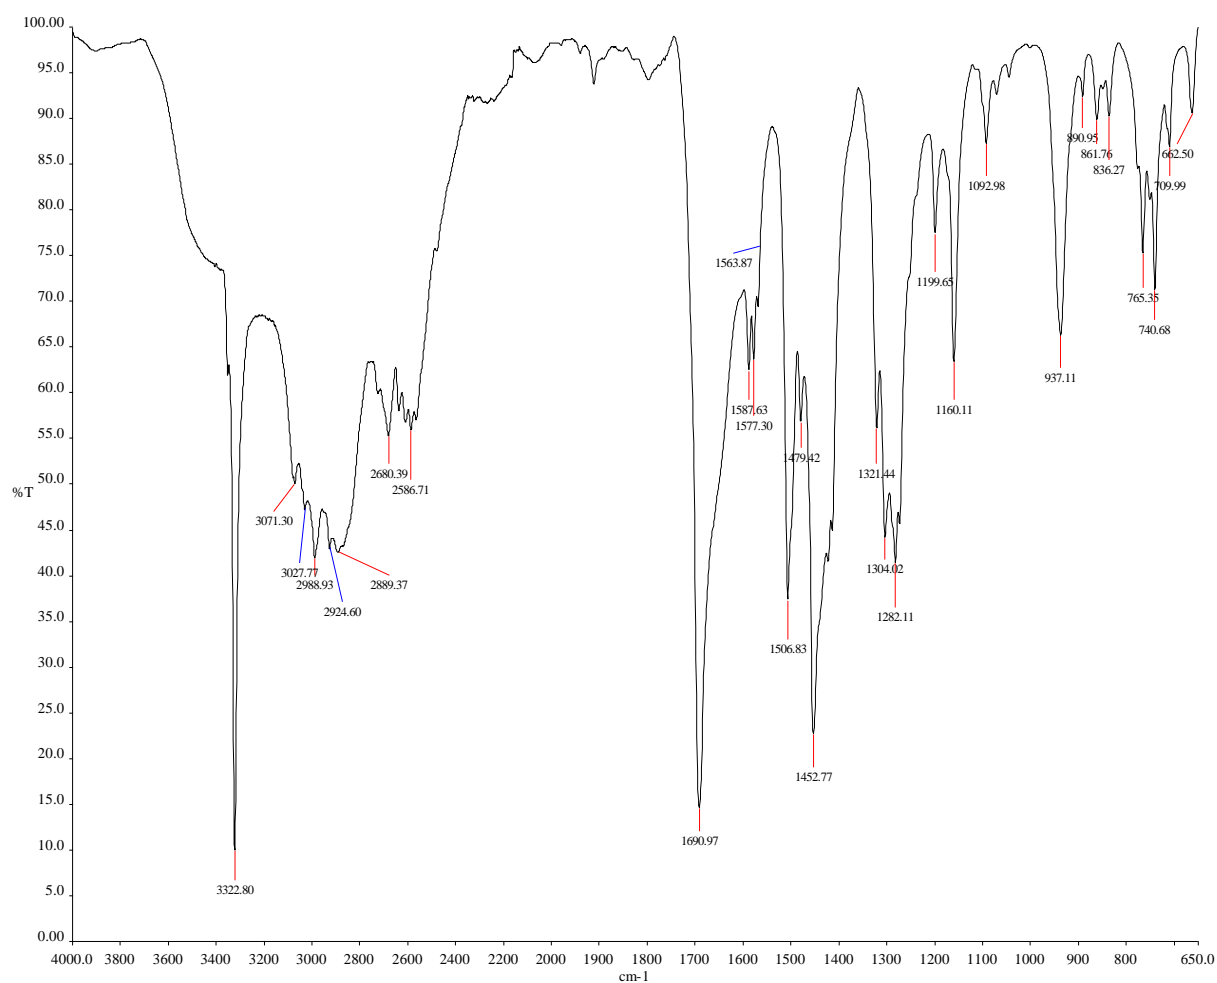

**Figure S3.** ATR-FTIR spectra of PM PVP/DCF (1:1 w/w).

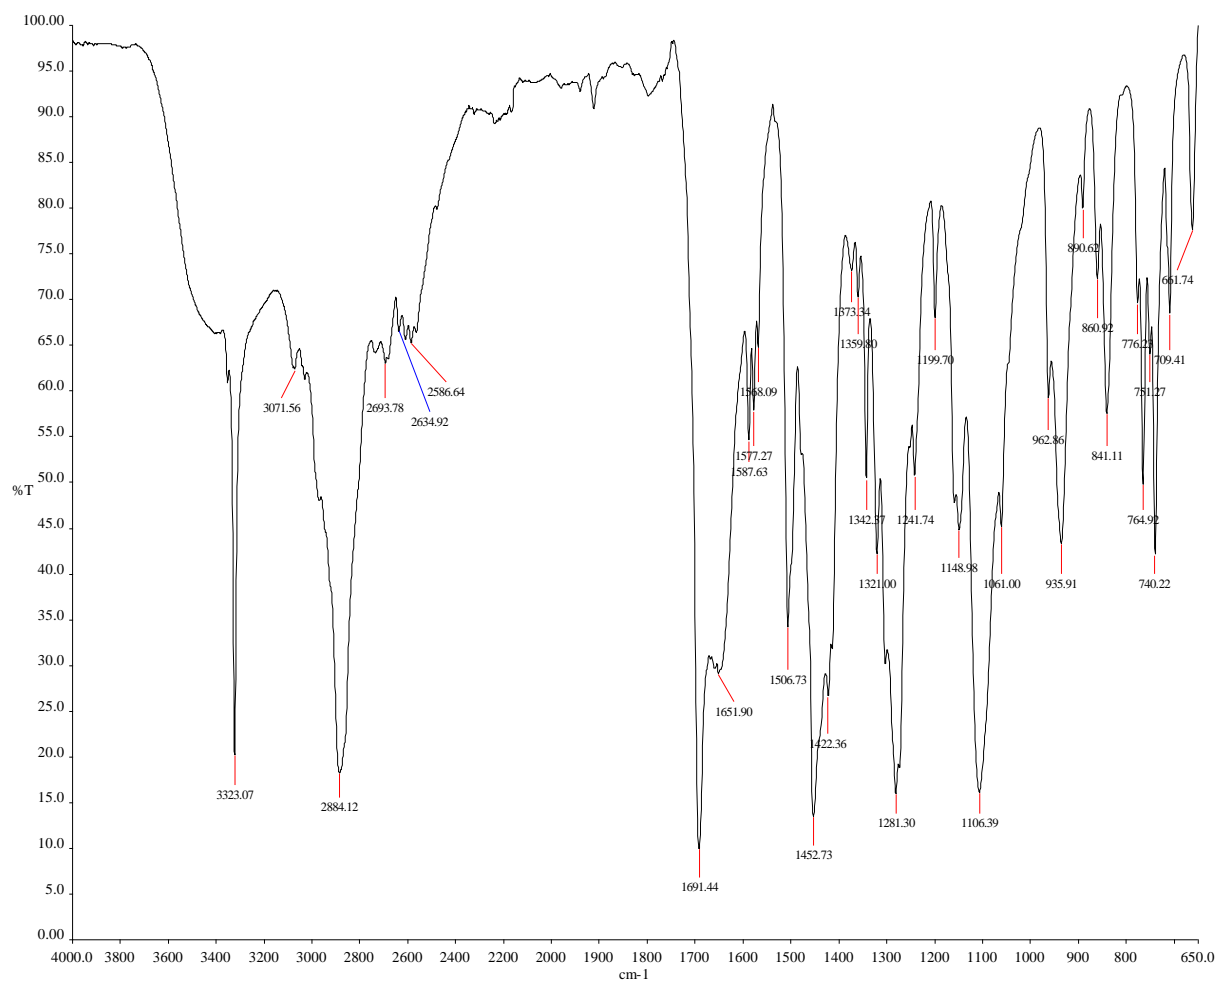

**Figure S4.** ATR-FTIR spectra of PM PVP/DCF-NS (1:1 w/w).

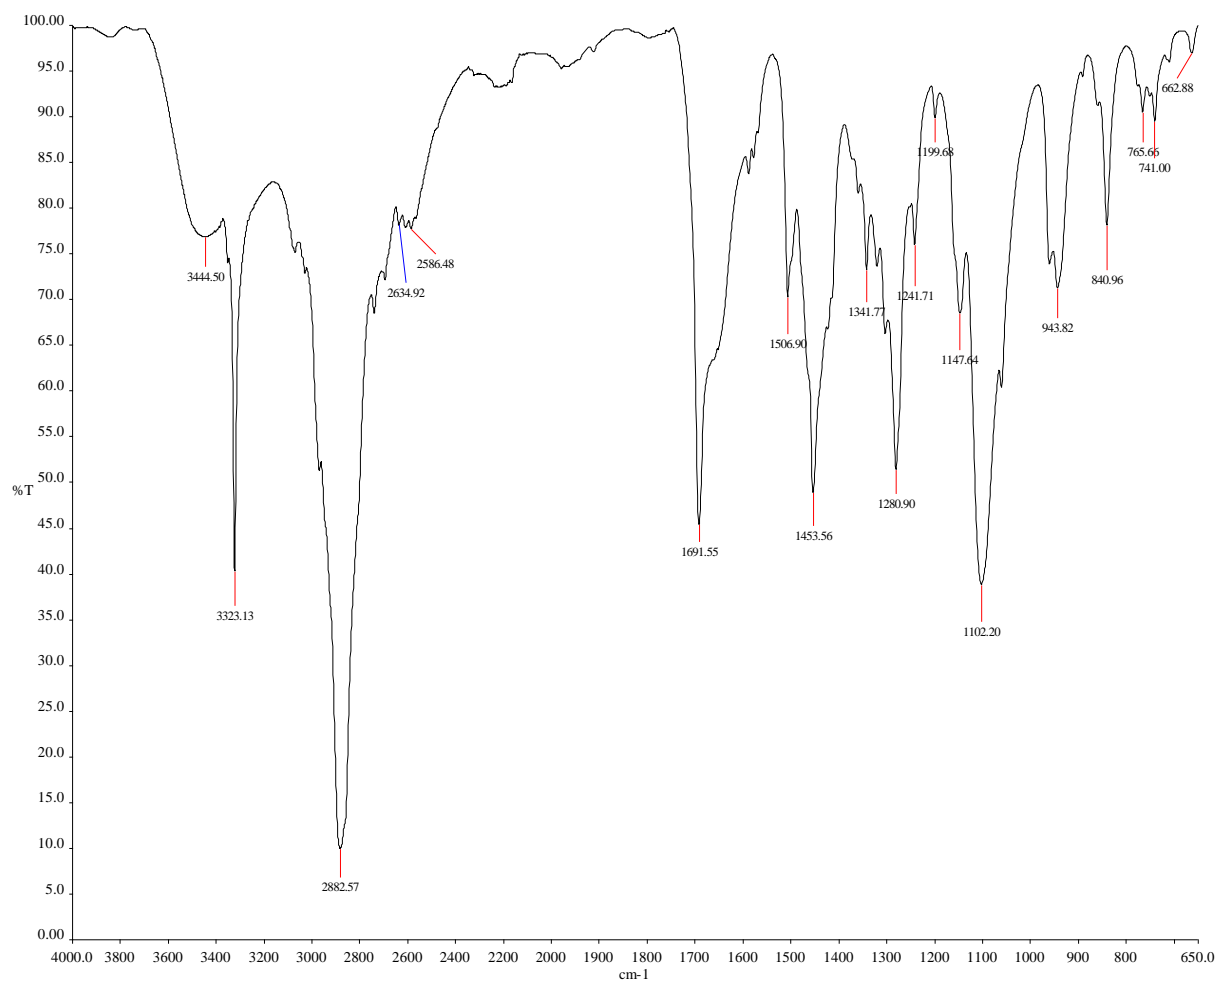

**Figure S5.** ATR-FTIR spectra of PM PVP/DCF/P188 (1:1 w/w).

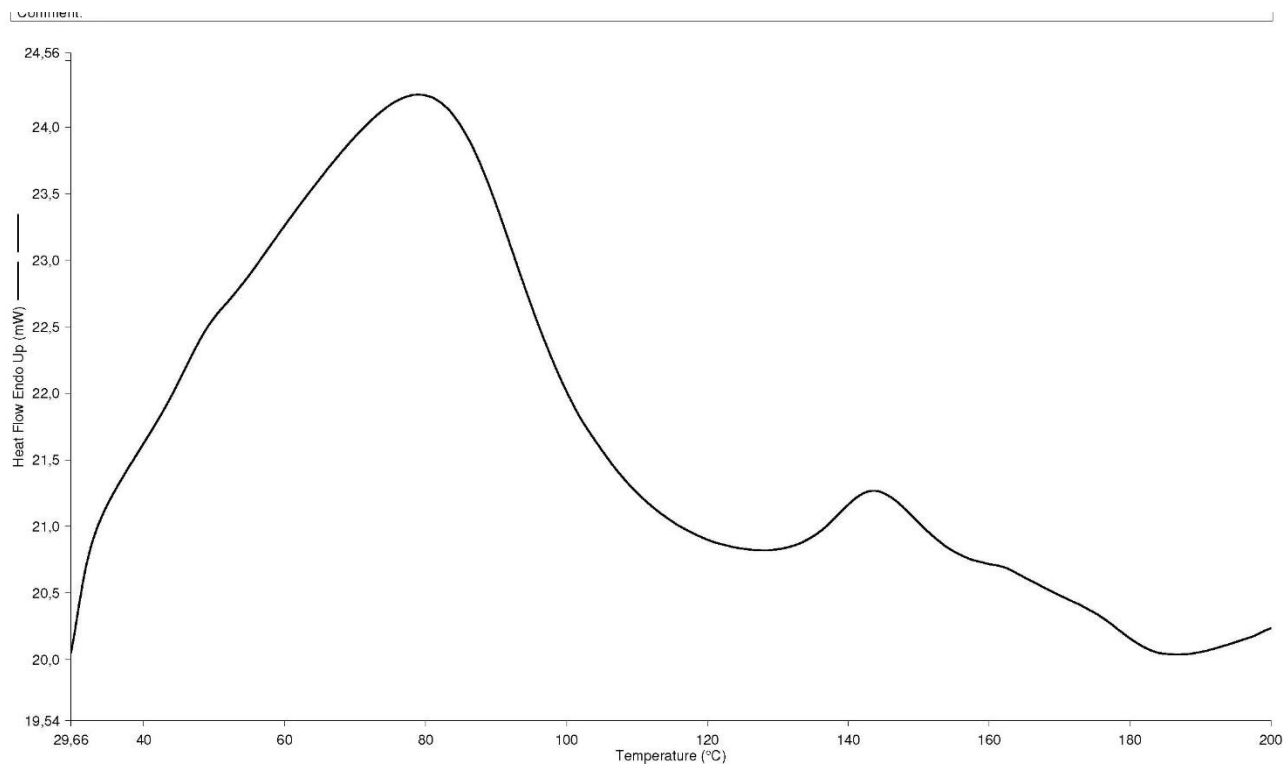

**Figure S6.** DSC thermogram of PVP K10.

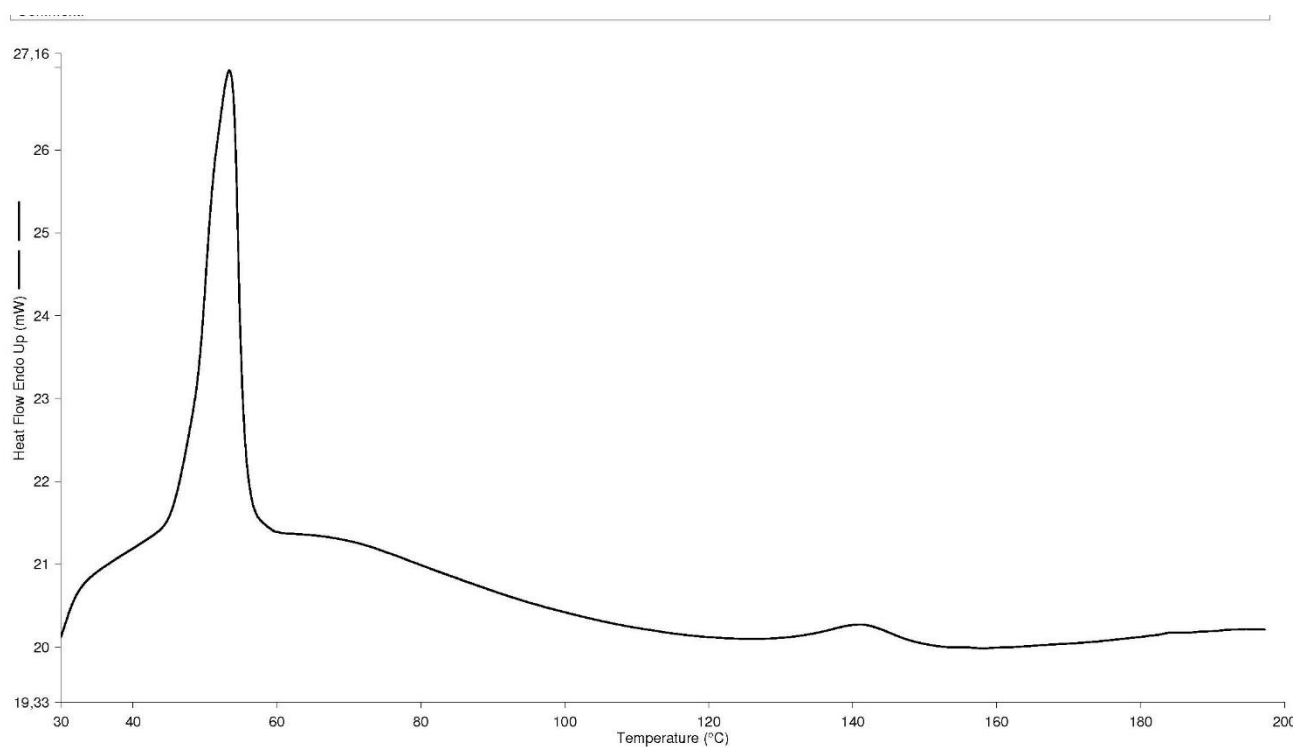

**Figure S7.** DSC thermogram of PM 1:1 (w/w) PVP/P188.

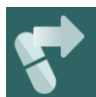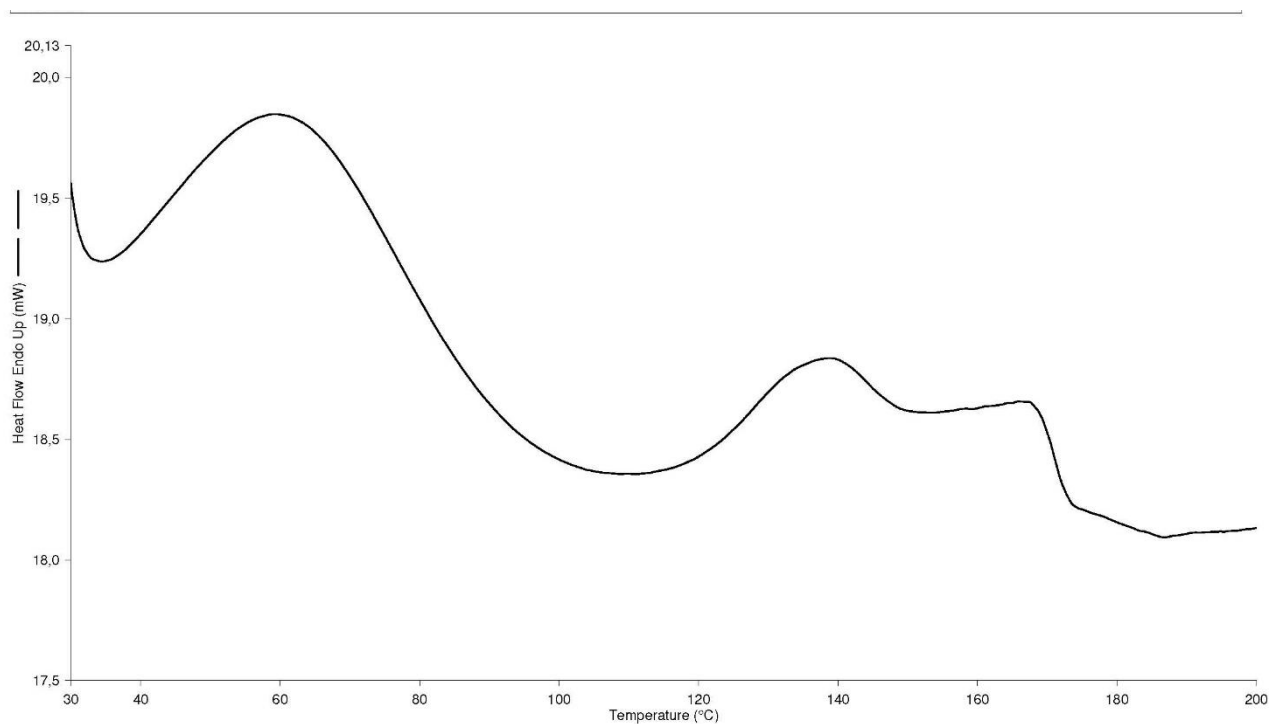

**Figure S8.** DSC thermogram of PM 1:1 (w/w) DCF/PVP.

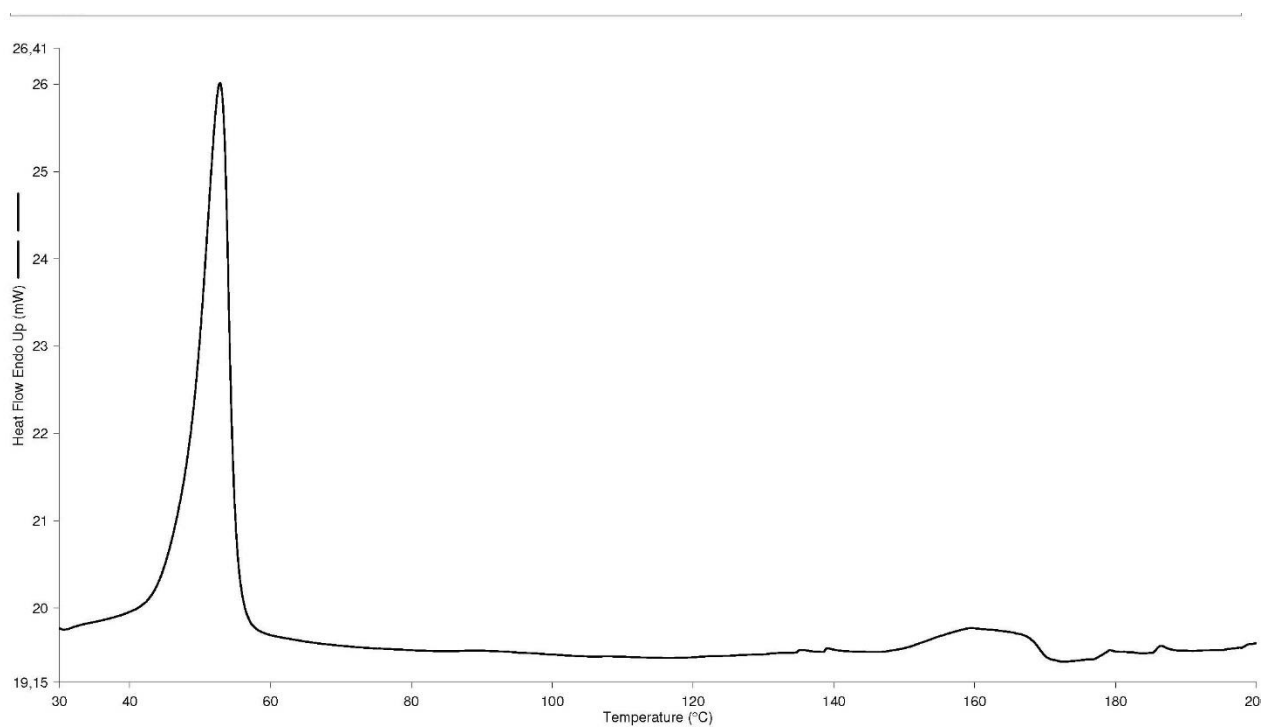

**Figure S9.** DSC thermogram of PM 1:1:1 (w/w/w) DCF/PVP/P188.



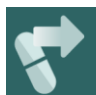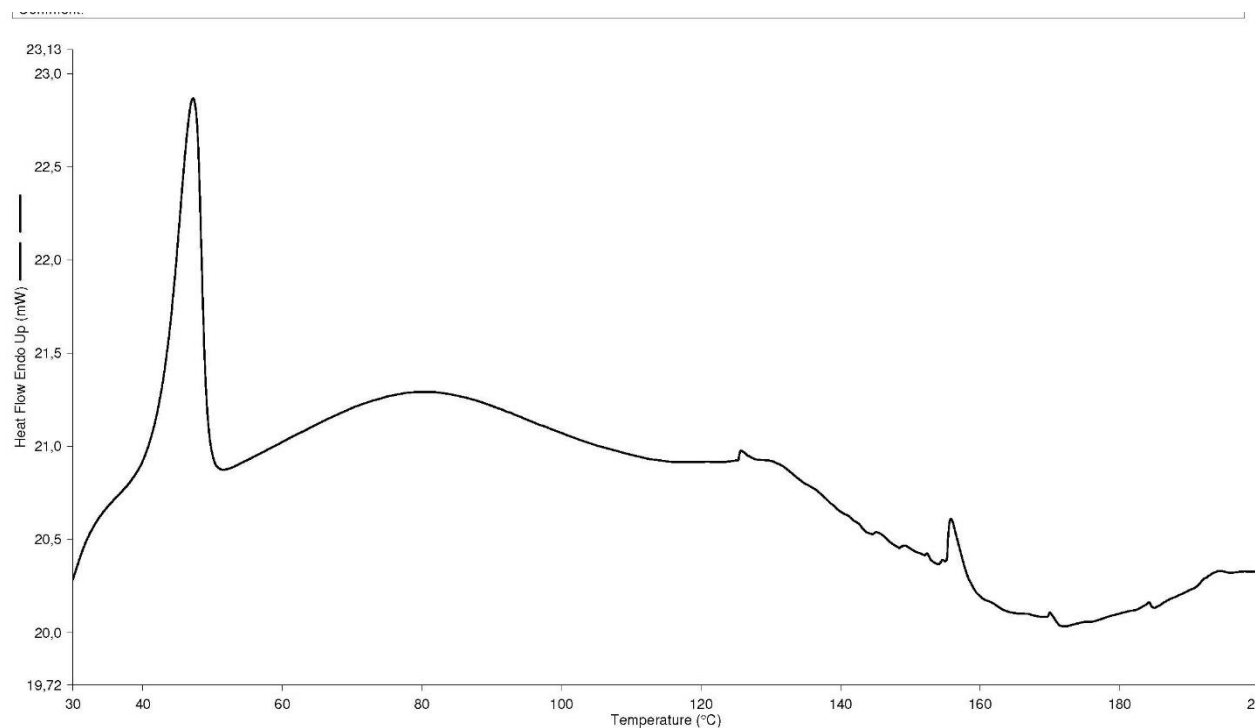

**Figure S10.** DSC thermogram of PM 1:1 (w/w) NS DCF/PVP.
